# Supplementary material for: Physical fitness and anthropometric characteristics among adolescents living in urban or rural areas of Kosovo
Source: BMC Public Health. 2017 Sep 16;17:711. doi: 10.1186/s12889-017-4727-4 (PMC5602925; doi:10.1186/s12889-017-4727-4)
Supplement: Additional file 1: — Fitness and anthropometric raw data (XLSX 54 kb) [file 12889_2017_4727_MOESM1_ESM.xlsx]

## Sheet: Raw data
	females (n=159)	age [median (min-max)] :		14.5 (13.9-15.5)
	males (n=195)	age [median (min-max)] :		14.6 (13.2-15.6)
ID	Living area (1= rural, 2=urban)	Weight (kg)	Height (m)	BMI (kg/m²)	Biceps (mm)	Triceps (mm)	Subscapular (mm)	Iliac crest (mm)	Sum of skin-folds (mm)	Handgrip strength (kg)	Sit & Reach (cm)	Standing broad long jump (cm)	Counter move-ment jump (cm)	Sprint 10m (s)	Sprint 20m (s)	MSFT	max Speed (km/h)
1	2	50.8	1.6	19.8437	8.8	17.6	13	7.6	47	28.15	30	130	33	2.64	4.47	2.1	9
2	2	63.1	1.67	22.6254	12.2	19.7	12.3	12.2	56.4	23	27	135	29	2.41	4.25	4.4	10
3	2	45.7	1.62	17.4135	6.9	8.3	6.6	4.5	26.3	16.5	12	122	32	2.12	3.98	5.5	10.5
4	2	61.6	1.61	23.7645	14	25.6	14.8	14.2	68.6	25.75	37	114	25	2.5	4.41	3.2	10
5	2	50.3	1.74	16.6138	3.6	6.5	6.6	4.5	21.2	35	14	190	42	2	3.49	7.8	11.5
6	2	75.2	1.93	20.1885	6.2	9	7.6	7.8	30.6	36	33	202	39	2.17	3.58	9.4	12.5
7	1	58	1.73	19.3792	4.4	9.9	8.7	4.6	27.6	44.5	34	183	44	2.27	3.77	9.8	12.5
8	1	57.8	1.7	20	5.3	7.1	8.7	9.2	30.3	41	20	208	47	1.9	3.26	8.11	12
9	1	64.3	1.8	19.8457	4.5	10.2	5.2	2.8	22.7	38	24	165	42	2.14	3.7	6.5	11
10	1	55.4	1.63	20.8514	11.6	24.4	11.4	10.5	57.9	29	8	125	32	2.36	4.42	4.3	10
11	1	47.9	1.58	19.1876	4.6	9.3	8.5	5.1	27.5	21	30	148	41	2.29	3.9	6.1	11
12	2	52.1	1.69	18.2417	3.4	6.3	9.8	8.2	27.7	33	18	166	33	2.43	3.87	5.8	10.5
13	2	44.5	1.55	18.5224	10.8	17.6	8.2	10.8	47.4	21.5	28	147	35	2.44	4.02	4.2	10
14	2	61.5	1.62	23.4339	9.5	19.1	16.2	18.3	63.1	28	34	147	23	2.6	4.73	2.4	9
15	2	72.5	1.74	23.9464	6.7	7.6	6.8	5.8	26.9	39.5	23	203	39	2.34	4	7.2	11.5
16	2	74.8	1.65	27.4747	16	32.8	21.6	26.1	96.5	40	24	168	44	2.08	3.75	5.5	10.5
17	1	87.1	1.75	28.4408	13.5	26.4	21.2	33.2	94.3	42	23	188	40	1.92	3.42	5.7	10.5
18	1	62.1	1.7	21.4879	6.5	7.8	8.5	8.7	31.5	28.5	23	163	35	2.11	3.62	5.2	10.5
19	1	68	1.66	24.677	7.1	10.6	10.8	13.7	42.2	43.5	26	210	41	1.95	3.41	4.2	10
20	1	42.3	1.6	16.5234	4.8	12.2	6.3	3.4	26.7	28	25	191	36	2.02	3.57	4.9	10
21	1	48.5	1.64	18.0324	5.9	10.1	11.2	8	35.2	26.5	27	130	28	2.27	3.9	4.3	10
22	1	51.7	1.62	19.6997	8	20.1	13.6	7.2	48.9	34	28	160	35	2.22	3.85	3.7	9.5
23	1	60.7	1.7	21.0035	5.3	9.8	7.7	5.8	28.6	40	25	197	39	2	3.44	5.1	10.5
24	2	59.2	1.62	22.5575	9	16.6	17.7	9.2	52.5	26.5	21	128	32	2.57	4.28	4.3	10
25	2	65	1.73	21.7181	7	13.2	11.8	12.2	44.2	44.9	29	175	36	2.1	3.63	4.8	10
26	2	52.4	1.69	18.3467	3.4	6.3	9.8	8.2	27.7	33.5	18	166	33	2.43	3.87	5.8	10.5
27	2	61.4	1.62	23.3958	14.4	18.2	12.1	13.1	57.8	24	28	110	30	2.5	4.63	3.5	9.5
28	1	40.8	1.61	15.7401	5	8.6	7.4	4	25	25.5	27	198	40	2.1	3.66	4.2	10
29	1	51.8	1.64	19.2594	4.6	7.8	6.4	5.6	24.4	30.5	24	173	46	2.17	3.75	6.9	11
30	1	55.1	1.7	19.0657	7.8	13.8	11.8	11	44.4	26.5	17	184	39	2.14	3.63	9.5	12.5
31	2	55.4	1.67	19.8645	11.2	19	13.2	19.6	63	22	31	119	30	2.56	4.52	2.4	9
32	2	54.8	1.63	20.6255	8.8	20.1	10.4	11.4	50.7	30.5	34	163	30	2.49	4.38	2.6	9
33	2	50.6	1.64	18.8132	4.4	9.6	7.2	9.2	30.4	24.3	32	171	37	2.01	3.54	6.2	11
34	2	62.9	1.69	22.023	11.2	19.7	9.6	9.7	50.2	27	31.3	135	27	2.33	4.21	3.8	9.5
35	2	53.3	1.62	20.3094	6.4	13.1	9.5	6.6	35.6	25	21.6	127	20	2.39	4.21	3.1	9.5
36	2	80.7	1.59	31.9212	21.2	35.8	34.2	33.6	124.8	26.5	33.2	119	23	2.6	4.82	2.4	9
37	1	77.8	1.75	25.4041	14	23.8	13.2	18.2	69.2	46.5	11	143	36	1.99	3.54	5.7	10.5
38	1	66.9	1.66	24.2778	16.8	24.4	18.6	16.7	76.5	36	25	107	31	2.14	3.96	3.8	9.5
39	1	80.4	1.74	26.5557	11.4	25.3	8.2	29	73.9	49.75	18	145	34	2.07	3.66	2.8	9
40	1	43	1.63	16.1843	3.8	4.6	5.8	8.3	22.5	28.5	26	214	41	1.96	3.36	6.7	11
41	2	89.2	1.69	31.2314	17.2	36.6	20	37.4	111.2	32	25	98	28	2.36	4.38	3.4	9.5
42	2	90.3	1.76	29.1516	21.6	31.4	36	36.3	125.3	29.5	39	115	25	2.5	4.46	2.5	9
43	2	48.3	1.69	16.9112	4.6	8	8.6	4.6	25.8	24.5	41	175	33	2.25	3.96	4.8	10
44	2	44.5	1.62	16.9563	4.2	9.4	7.2	5.6	26.4	24.5	17	148	42	2.21	3.91	6.4	11
45	2	65.4	1.7	22.6298	8.2	9.4	11.9	13.7	43.2	37.75	30	160	38	2.2	3.61	6.8	11
46	2	54.1	1.65	19.8714	8	13.7	14.2	12	47.9	25.5	31	140	33	2.18	4.15	5.2	10.5
47	2	62	1.64	23.0518	11.5	16.6	13	16.6	57.7	31	26	140	39	1.9	3.47	2.2	9
48	2	54.4	1.69	19.047	4.6	7.1	6.9	8.6	27.2	36	16	172	38	2.05	3.76	6.5	11
49	2	57.2	1.71	19.5616	3.8	7.2	7.8	5	23.8	36.5	16	157	44	2	3.48	8.5	12
50	1	59.5	1.68	21.0813	8	19.6	10.3	9.8	47.7	29.85	35.3	152	33	2.16	3.72	4.9	10
51	1	51.5	1.61	19.8681	9	19.8	7.4	10.6	46.8	26.5	31	122	30	2.39	4.36	4.1	10
52	2	68.7	1.68	24.341	11.1	14.2	17.2	16	58.5	43.25	27	171	44	2.13	3.69	7.1	11.5
53	2	70	1.7	24.2215	11.2	16	12.6	18.4	58.2	37	17	180	40	2.07	3.78	5.6	10.5
54	2	74.9	1.73	25.0259	10.6	18.3	13.2	20.5	62.6	34	23	157	36	2.23	4.34	5.4	10.5
55	1	79.7	1.66	28.9229	18.7	21	23.1	27.8	90.6	28.75	35	118	21	2.44	4.49	3.4	9.5
56	1	63.5	1.8	19.5988	4.3	8.9	8.3	6.4	27.9	22	20.5	139	32	2.11	3.61	7.1	11.5
57	1	86.3	1.75	28.1796	19.2	29.4	34.1	35	117.7	31	32	111	23	2.49	4.45	2.8	9
58	2	72.1	1.57	29.2507	24.6	38.8	24.2	37.2	124.8	31.5	31	110	21	2.57	4.79	2.6	9
59	2	56.6	1.68	20.0539	7.8	13	9.2	10	40	23.5	23	184	40	2.1	3.54	9.2	12.5
60	2	74.2	1.93	19.92	6.4	9.3	8.1	8.2	32	36.25	33	202	39	2.17	3.58	9.4	12.5
61	2	49.3	1.55	20.5203	9.2	11.6	13.8	13.4	48	25	16	149	37	2.51	4.11	5.3	10.5
62	2	57.1	1.82	17.2383	4.8	6.3	9.6	5.2	25.9	43.5	23	192.3	43	1.98	3.32	6.4	11
63	2	63.1	1.77	20.1411	9.2	11.4	9.4	17.8	47.8	30.5	13	180	32	2.17	3.74	6.3	11
64	2	47.6	1.61	18.3635	4.1	7.3	6.8	5	23.2	30.9	19	170	34	2.24	3.81	4.1	10
65	1	61.7	1.72	20.8559	4.7	9.3	9.4	9.4	32.8	33	29	148	39	2.02	3.47	5.7	10.5
66	1	69.5	1.78	21.9354	7.8	10.4	8.4	9	35.6	35	25	198	40	2.16	3.61	3.1	9.5
67	1	42.9	1.59	16.9693	6.9	11.6	9.4	9	36.9	14.5	25	160	37	2.36	4.04	2.5	9
68	1	52.3	1.69	18.3117	4.4	6.6	5.4	4.7	21.1	32	29	196	42	2.06	3.52	6.7	11
69	1	52.7	1.57	21.3802	14.3	20.3	8.9	19.2	62.7	23.4	28.5	170	38	2.17	3.89	4.5	10
70	1	54.1	1.65	19.8714	12.6	22	8.6	8.1	51.3	25.5	24	148	28	2.19	3.97	4.4	10
71	1	75.6	1.73	25.2598	13.2	22.4	28.1	30.3	94	48.5	21	137	34	2.35	3.61	5.8	10.5
72	1	61.2	1.71	20.9295	7.4	9	8.2	4.2	28.8	46.5	29	199	42	1.89	3.23	9.9	12.5
73	1	54.3	1.6	21.2109	10.3	12.2	9.2	8.7	40.4	24.5	25	111	23	2.54	4.55	2.2	9
74	2	51.1	1.64	18.9991	6.6	10.2	7.6	8.3	32.7	26.5	19	131	31	2.31	4.11	3.8	9.5
75	2	65.5	1.72	22.1403	7.3	13.5	11.4	12.4	44.6	45	29	175	36	2.1	3.63	4.8	10
76	2	58.8	1.7	20.346	7.3	11.4	6.6	5.4	30.7	33	36	198	40	2.22	3.77	10.1	13
77	1	50.5	1.66	18.3263	3.7	6.2	7.1	3.4	20.4	30	25	142	34	2.15	3.64	5.5	10.5
78	1	68.5	1.81	20.909	6.2	10.1	9.3	7.3	32.9	40	31	190	41	2.06	3.44	9.6	12.5
79	2	47.8	1.6	18.6719	7.8	10.1	9.9	10.3	38.1	28	21	96	23	2.87	5.01	2.8	9
80	2	54.3	1.76	17.5297	4	6.6	6.7	5.2	22.5	25.35	14	170	31	2.4	3.98	6.6	11
81	2	57.4	1.69	20.0973	8.3	10.4	8.4	16.4	43.5	29.75	21.2	201	41	2.01	3.36	9.3	12.5
82	1	58.1	1.69	20.3424	4.6	8.4	10	3.2	26.2	43	24	187	45	1.98	3.34	9.5	12.5
83	1	103.8	1.79	32.396	23	31	32.1	40.4	126.5	45	27.5	148	29	2.36	4.07	3.6	9.5
84	1	47.1	1.61	18.1706	4.2	8.6	7.6	5	25.4	33.8	16	177	36	1.98	3.39	8.7	12
85	1	103.2	1.76	33.3161	19.2	38.4	40	48.1	145.7	45.5	26	121	26	2.32	4.35	3.2	9.5
86	1	49.1	1.6	19.1797	6	15.2	9.5	9.6	40.3	23	25.5	162	34	2.02	3.59	6.8	11
87	1	52.4	1.63	19.7222	6.5	12.8	8.6	5.4	33.3	27.5	32.5	108	30	2.49	4.55	3.3	9.5
88	1	51.2	1.68	18.1406	5.1	9.7	9.9	10.1	34.8	23.1	35	127	32	2.31	4.42	2.2	9
89	2	89.7	1.69	31.4065	19.2	30	28.2	32.6	110	40.25	18.5	154	35	2.14	3.73	3.4	9.5
90	2	88	1.7	30.4498	24	36.2	24.8	46.6	131.6	30	31	143	32	2.43	4.42	3.4	9.5
91	2	53.7	1.63	20.2115	6.5	12.4	14.2	12.3	45.4	27	27	117	29	2.68	4.79	4.5	10
92	2	47.8	1.58	19.1476	6.4	12.5	11.8	7.2	37.9	25	27	130	30	2.61	4.64	3.6	9.5
93	2	91.2	1.65	33.4986	11.6	21.8	20.4	30.2	84	42.25	41	175	33	2.24	3.76	6.6	11
94	2	56.3	1.66	20.4311	5.8	8.2	9.9	8.6	32.5	34	16	175	42	1.96	3.36	6.8	11
95	2	40.3	1.56	16.5598	2.9	5	5.4	4.6	17.9	21	16	160	31	2.35	3.92	7.3	11.5
96	2	47.3	1.7	16.3668	4.5	7.6	6.2	4	22.3	34.25	28	212	46	2.01	3.56	4.6	10
97	2	55.2	1.73	18.4436	4.3	8.6	8.3	9.2	30.4	37	10	148	35	2.18	3.76	7.2	11.5
98	2	70.1	1.72	23.6952	11.6	12	13.8	14.4	51.8	43.5	20	200	46	1.97	3.46	7.4	11.5
99	2	49.4	1.66	17.9271	4.2	8.5	6.4	5.4	24.5	33.75	12	158	44	1.98	3.39	6.4	11
100	2	48.8	1.57	19.798	7.4	14.7	14	9	45.1	23.25	24	144	33	2.39	4.15	4.4	10
101	1	46.1	1.56	18.9431	5.3	11.1	6.7	4.6	27.7	22	31	165	34	2.16	3.9	4.3	10
102	1	64.3	1.68	22.782	9.2	21.4	14.5	8.6	53.7	32.5	24	126	31	2.55	4.46	3.1	9.5
103	2	51.4	1.63	19.3459	6.8	15.5	14.4	11.8	48.5	27.5	27	134	28	2.3	4.06	2.4	9
104	2	72.3	1.75	23.6082	6.5	7.6	6.6	5.8	26.5	39.5	23	203	39	2.34	4	7.2	11.5
105	2	45.6	1.66	16.5481	4.9	7.3	6.4	4	22.6	32.5	25	163	50	2.06	3.46	7.9	11.5
106	2	60	1.74	19.8177	5.9	13.1	9.6	7.4	36	31	21	183	35	2.14	3.81	4.6	10
107	2	54	1.74	17.8359	4.6	8.6	5	5.2	23.4	28.5	19	187	40	2.03	3.41	6.7	11
108	2	63.1	1.77	20.1411	8.8	14.1	9.1	13.2	45.2	30.5	2	158	35	2.18	3.89	5.3	10.5
109	1	82.5	1.7	28.5467	21.1	23.2	23.4	24.1	91.8	45	23	132	36	2.2	3.83	3.4	9.5
110	2	49.2	1.57	19.9602	7.2	13.2	10.2	9.6	40.2	25.5	30.8	109	29	2.33	4.07	3.8	9.5
111	2	70.2	1.7	24.2907	19.7	27	18.2	19.8	84.7	25.5	25	110	23	2.65	4.69	2.4	9
112	1	52.2	1.74	17.2414	4.3	6.6	7.4	4.6	22.9	28.5	27	182	39	2.05	3.53	7.1	11.5
113	1	67	1.66	24.3141	6.7	11.6	10.8	14.2	43.3	46.5	13	205	40	2.05	3.54	6.2	11
114	2	50.1	1.7	17.3356	6.2	7.4	8.9	5.7	28.2	29.65	20	160	38	2.11	3.67	4.8	10
115	2	73.2	1.69	25.6294	9.2	15.7	13.1	18.2	56.2	33.5	22	154	34	2.32	3.99	4.2	10
116	2	54.2	1.7	18.7543	6	7.3	8.2	7	28.5	30.5	27	226	49	1.89	3.3	8.2	12
117	2	54.7	1.59	21.6368	10.2	15.7	10.8	8.6	45.3	35	16	147	31	2.26	3.94	3.2	9.5
118	2	55.6	1.55	23.1426	12.6	18.8	15.6	15	62	23.9	26	130	31	2.27	3.92	4.1	10
119	2	65.2	1.74	21.5352	6.3	12.4	10.6	11.6	40.9	36.9	29	179	40	1.98	3.35	8.1	12
120	1	35.9	1.55	14.9428	4.2	10.2	5.2	2.8	22.4	21	15	143	37	2.14	3.84	3.7	9.5
121	1	34.8	1.54	14.6736	3.1	9.3	6.2	2.8	21.4	20	14	168	31	2.21	3.86	3.8	9.5
122	1	40.9	1.57	16.593	5.2	7.2	6.4	4.3	23.1	20	32	190	35	2.1	3.71	5.8	10.5
123	2	49.3	1.67	17.6772	5	11.4	12.2	7.4	36	27	15	115	30	2.37	4.41	4.5	10
124	1	60	1.66	21.7738	8.1	24.4	11.7	8.6	52.8	27.5	26	121	31	2.37	4.36	3.2	9.5
125	2	59	1.62	22.4813	7.4	17	10.4	12.8	47.6	48	28	181	45	2.18	3.58	7.3	11.5
126	2	51.7	1.64	19.2222	11.9	14.6	7.8	9.2	43.5	23.85	26	170	35	2.36	4.03	6.1	11
127	1	56.1	1.62	21.3763	8	17.4	8.6	6.4	40.4	30	26	120	34	2.37	4.19	3.2	9.5
128	1	65.6	1.71	22.4343	5.4	9.9	8.7	6.3	30.3	36.5	32	173	40	1.91	3.38	7.9	11.5
129	1	45.3	1.66	16.4393	5.4	9.1	8.4	5	27.9	23	18	160	33	2.25	3.91	7.5	11.5
130	1	64.1	1.73	21.4174	6.4	9.8	8.7	6.1	31	41	29	173	38	2.2	3.71	5.3	10.5
131	1	67.5	1.72	22.8164	11.4	15.8	8	8.1	43.3	31	13	165	24	2.19	3.75	6.3	11
132	1	98.2	1.6	38.3594	16.2	27.2	50.4	63.4	157.2	27	37	100	20	2.9	5.19	2.2	9
133	2	55.6	1.76	17.9494	4	7	6.8	6.5	24.3	36	18	175	32	2.19	3.82	7.9	11.5
134	1	38.2	1.56	15.6969	4.4	9.6	6.6	4.9	25.5	24	13	142	31	2.11	3.84	8.6	12
135	1	41.5	1.51	18.201	10.2	17.4	10.8	12.6	51	20.5	30	147	35	2.38	4.27	5.5	10.5
136	2	61.9	1.65	22.7365	11.7	15.8	13.4	12.4	53.3	31	34	139	32	2.45	4.45	2.6	9
137	2	52.2	1.65	19.1736	6.9	10.8	8.2	7.4	33.3	30	27.2	146	31	2.46	4.22	2.1	9
138	2	38.2	1.57	15.4976	7.6	8.5	5.6	4.6	26.3	21	32	147	34	2.24	4	5.6	10.5
139	2	58.1	1.6	22.6953	10.4	12.3	13.5	15.6	51.8	19	20	126	28	2.52	4.53	2.3	9
140	2	67.7	1.71	23.1524	9.6	18.6	12.8	20.8	61.8	23	33	110	22	2.83	5.04	2.2	9
141	1	63.8	1.62	24.3103	5.2	6.9	9.9	11	33	34.9	26	175	33	2.05	3.5	9.7	12.5
142	2	50.4	1.67	18.0716	8.5	13.6	13.6	9	44.7	23	25	105	26	2.61	4.66	4.7	10
143	2	60.3	1.63	22.6956	5.7	9.8	8.8	8.5	32.8	36.5	28	172	45	1.98	3.38	6.8	11
144	2	53.8	1.66	19.5239	9.3	16.1	12.8	8.9	47.1	29	32.1	143	33	2.43	4.43	4.5	10
145	1	53.8	1.67	19.2908	6	16.6	10	7.2	39.8	23	26	120	25	2.54	4.43	3.3	9.5
146	2	57.2	1.57	23.2058	10.4	11.2	10.2	8	39.8	34	29	145	37	2.38	4.05	4.6	10
147	1	75.4	1.73	25.193	11.5	15.3	14.7	21	62.5	31.25	8	135	38	2.08	3.51	3.9	9.5
148	1	50.8	1.55	21.1446	7	11.2	9.8	13	41	28.6	24.5	128	29	2.31	3.96	4.1	10
149	1	44	1.54	18.5529	6.9	14.2	10.3	13.4	44.8	18.9	26	121	25	2.46	4.47	3.3	9.5
150	1	61.3	1.65	22.5161	14.1	24	13.3	13.5	64.9	26.5	25	145	32	2.54	4.55	4.2	10
151	2	70.6	1.73	23.5892	14.3	26.7	17	14	72	27.9	30	112	26	2.51	4.59	3.6	9.5
152	2	56.1	1.63	21.1148	7.6	12.6	10.3	10.5	41	29	26	149	29	2.33	4.08	4.2	10
153	2	88.3	1.7	30.5536	16.9	35.2	21	35.2	108.3	32.75	34	101	26	2.35	4.32	3.1	9.5
154	2	41.3	1.57	16.7552	5.6	8.3	8.8	6.8	29.5	21.25	18	116	30	2.69	4.82	2.6	9
155	1	79.1	1.66	28.7052	14.2	30.4	23	20.8	88.4	40	30	145	24	2.39	4.3	3.2	9.5
156	2	57.5	1.59	22.7444	13	22.8	18.6	13.8	68.2	25	37	102	30	2.23	4.28	3.4	9.5
157	1	52.4	1.71	17.92	4.3	7.8	8.8	9.3	30.2	33.5	20	152	33	2.17	3.78	4.6	10
158	1	79.3	1.72	26.805	15.2	22.1	13.1	18.5	68.9	42	28	146	31	2.02	3.63	4.2	10
159	1	48.7	1.62	18.5566	6.9	14.2	7.6	8.2	36.9	24.5	23	127	27	2.54	4.39	3.3	9.5
160	1	50.2	1.56	20.6279	6.9	17	8.9	9	41.8	28	17	110	31	2.53	4.72	2.9	9
161	1	53.5	1.66	19.415	16.6	16.8	10.8	14.2	58.4	26.5	5	115	21	2.39	4.44	3.7	9.5
162	2	51.7	1.72	17.4757	4.4	6.2	7.5	4.7	22.8	32.5	17	190	39	2.29	3.81	6.9	11
163	2	67.7	1.68	23.9867	8.5	21	13.9	12.9	56.3	32.75	26	140	31	2.44	4.18	4.2	10
164	2	52.9	1.63	19.9104	8.4	19	10.2	10.2	47.8	25.5	37	136	31	2.54	4.34	5.7	10.5
165	2	76	1.64	28.257	13.6	14	13.8	16.4	57.8	43.7	28	200	47	2.16	3.67	4.9	10
166	2	60	1.73	20.0474	7	11.6	8.6	13.7	40.9	31.5	29	163	42	2.11	3.55	7.2	11.5
167	2	56.3	1.73	18.8112	4.8	7.2	6.4	5.2	23.6	26.5	21	200	37	2.14	3.59	10.1	13
168	2	80.5	1.68	28.5218	23.7	32.2	29.2	28.2	113.3	30.5	13	120	29	2.43	4.4	2.4	9
169	2	68.1	1.82	20.5591	6.1	6.7	7.2	5.8	25.8	47	15	215	39	1.97	3.47	8.8	12
170	2	68.7	1.6	26.8359	14.5	23.7	15.2	17	70.4	31.25	20	146	32	2.2	4.13	3.4	9.5
171	2	71.1	1.78	22.4403	6.3	8.4	7.8	8.8	31.3	39.75	21.2	201	41	2.01	3.36	9.3	12.5
172	2	47.8	1.59	18.9075	11.4	18.2	9.5	12.6	51.7	17.5	17	116	17	2.62	4.89	2.5	9
173	1	69.2	1.62	26.3679	13.6	26.2	23.3	28.4	91.5	25.5	20	105	20	2.79	5.16	2.2	9
174	2	54.9	1.61	21.1797	13.2	20.2	16.8	14	64.2	21.5	32	124	28	2.42	4.31	3.2	9.5
175	2	56.4	1.55	23.4755	14.6	27	11	15.2	67.8	24.5	29	131	23	2.37	4.39	2.8	9
176	2	54.2	1.64	20.1517	8.6	14.6	8.3	9.4	40.9	20	15	104	24	2.64	4.56	2.4	9
177	2	45.8	1.63	17.2381	11.1	13.4	11.6	8	44.1	20.5	21	108	25	2.52	4.44	2.4	9
178	1	52.5	1.68	18.6012	5.8	8.5	7.2	4.4	25.9	38.5	23	224	45	1.86	3.17	10.6	13
179	1	55.9	1.7	19.3426	3.6	8.5	6.6	5.5	24.2	40	30	208	46	1.84	3.27	10.6	13
180	2	58.4	1.7	20.2076	7.8	13.6	10.1	10	41.5	24.5	23	135	32	2.32	4.23	3.7	9.5
181	2	66.5	1.78	20.9885	8.2	13	10.3	12.3	43.8	26.5	36	141	31	2.23	3.97	3.4	9.5
182	2	50.6	1.69	17.7165	10.4	13.7	10.4	9	43.5	19.25	15	104	24	2.64	4.56	2.4	9
183	2	44.1	1.61	17.0132	7.1	12.6	11.5	8.2	39.4	22	27	124	33	2.45	4.37	2.8	9
184	2	65	1.77	20.7476	6.2	11.5	7.8	8.4	33.9	38	30	208	39	2.04	3.46	7.2	11.5
185	1	63.8	1.73	21.3171	4.6	11.6	8.8	7.8	32.8	48.4	25	210	53	2.15	3.44	11.1	13.5
186	2	55.2	1.73	18.4436	4.3	8.6	8.3	9.3	30.5	37.5	10	148	35	2.18	3.76	7.2	11.5
187	2	90.2	1.63	33.9493	9.6	21.6	20.2	31	82.4	45.5	41	175	33	2.24	3.76	6.6	11
188	2	57.5	1.74	18.9919	3.8	7.6	6.7	4.2	22.3	32.6	15	171	43	2.56	4.38	8.7	12
189	2	61.1	1.68	21.6482	6.2	11.6	9.8	11	38.6	31.5	13	188	38	2.15	3.68	5.6	10.5
190	2	56.8	1.77	18.1302	4.4	7	8.5	16.4	36.3	35.75	25	163	39	2.12	3.69	5.4	10.5
191	2	52.9	1.7	18.3045	4.6	8	7.6	5	25.2	32.5	19.5	185	46	1.94	3.5	7.2	11.5
192	2	91.5	1.66	33.2051	15	29.2	30.2	36.6	111	20	28	94	21	2.84	5.29	2.1	9
193	2	57.7	1.51	25.3059	9.8	16.2	13.4	12.8	52.2	25	31	150	31	2.37	4.2	5.1	10.5
194	2	55.9	1.79	17.4464	3.6	6.4	7.4	5.2	22.6	37	11	172	41	2.18	3.6	8.5	12
195	1	75	1.79	23.4075	9.5	23.2	10.4	10.8	53.9	33	23	166	37	2.11	3.63	6.2	11
196	1	49	1.61	18.9036	11.6	11.8	7.8	11.8	43	23	32	128	32	2.34	4.11	2.5	9
197	1	57.3	1.55	23.8502	6.3	8.4	8.6	7.1	30.4	22.5	25.5	152	30	2.25	3.99	2.6	9
198	1	50.4	1.74	16.6468	5.2	7.6	7.2	5.4	25.4	31.5	7	156	32	2.01	3.59	4.4	10
199	1	60.6	1.69	21.2177	7.3	11.2	10.2	8.7	37.4	37	23	198	43	1.92	3.32	4.4	10
200	1	60.8	1.59	24.0497	11	20.3	18.2	23.7	73.2	33.8	28	115	30	2.32	4.17	2.6	9
201	2	61.3	1.68	21.7191	6.2	11.6	9.8	11.4	39	30.5	13	188	38	2.15	3.68	5.6	10.5
202	1	70.3	1.68	24.9079	12.2	23.8	18.2	13.2	67.4	25	28.5	118	25	2.43	4.2	2.8	9
203	1	45.5	1.6	17.7734	5.6	11.9	7.2	7.1	31.8	24.5	37	112	31	2.38	4.33	6.3	11
204	2	51.4	1.6	20.0781	12.6	20	8.6	14.6	55.8	26	31	138	36	2.41	4.1	4.3	10
205	1	43.7	1.66	15.8586	4.6	10	6.2	4.1	24.9	26	13	133	24	2.54	4.4	3.3	9.5
206	1	45.8	1.5	20.3556	6.6	19.8	9.2	11.8	47.4	24.5	27	125	28	2.57	4.51	2.6	9
207	1	67.9	1.74	22.427	4.9	9	7.2	5.6	26.7	38	15.3	191	38	2.03	3.46	8.6	12
208	2	52.8	1.62	20.1189	8.1	18.4	11.6	13.6	51.7	18	27	130	22	2.59	4.57	4.2	10
209	1	49.2	1.67	17.6414	4.8	7.4	6.9	3.6	22.7	30.3	23	164	41	2.08	3.57	8.8	12
210	2	76.2	1.71	26.0593	9.2	15.9	15.2	21.6	61.9	46	30.2	199	35	2.25	4.06	3.6	9.5
211	1	44.9	1.65	16.4922	7.6	9.6	7.3	7.8	32.3	24	15	109	33	2.28	4.09	3.2	9.5
212	1	68	1.77	21.7051	4.7	10.2	8	4	26.9	45	19	202	48	1.96	3.33	7.6	11.5
213	1	63.5	1.72	21.4643	8.9	13.4	10.7	11.7	44.7	35.5	5	187	41	2.1	3.63	3.1	9.5
214	1	90.1	1.7	31.1765	25	35.2	36	50	146.2	30.6	11	111	26	2.41	4.32	2.8	9
215	2	56.3	1.76	18.1754	4.2	6.5	6.8	5	22.5	26.35	14	170	31	2.4	3.98	6.6	11
216	2	41.3	1.57	16.7552	2.9	5.2	5.2	4.6	17.9	21.5	16	160	31	2.35	3.92	7.3	11.5
217	2	70.8	1.62	26.9776	25.2	28.6	23.4	28.6	105.8	25	24	123	23	2.65	4.62	2.2	9
218	2	61.8	1.63	23.2602	15.6	16.6	11.6	11.4	55.2	29.5	22	130	38	2.47	4.42	4.8	10
219	2	44.6	1.59	17.6417	6.2	15.6	7.6	7	36.4	23	20	155	34	2.2	3.92	5.2	10.5
220	2	69.6	1.73	23.255	7.2	12.8	12.2	12.2	44.4	50.75	35	208	44	2.04	3.44	7.1	11.5
221	2	54.1	1.62	20.6142	6.8	8.2	7.9	7.6	30.5	30.3	21	170	30	2.01	3.58	8.3	12
222	2	79.8	1.74	26.3575	12.9	22.8	16.6	24.4	76.7	40	27	143	28	2.56	4.45	6.1	11
223	2	75.3	1.63	28.3413	21.1	30.6	17	32.2	100.9	21.25	25	111	26	2.54	4.57	1.6	8.5
224	2	46.5	1.62	17.7183	7.8	15.2	14.2	8.2	45.4	22.25	32.5	134	29	2.29	4.03	4.4	10
225	2	62	1.67	22.231	11.6	23	13.8	11.8	60.2	29	25	142	26	2.35	4.36	3.8	9.5
226	2	78.5	1.69	27.485	24.7	29.8	29.7	26.6	110.8	31.75	18.5	154	35	2.14	3.73	3.4	9.5
227	2	58.3	1.67	20.9043	10	17.1	12.8	15.4	55.3	28.8	32	130	34	2.51	4.43	4.2	10
228	2	104	1.8	32.0988	17.8	23.2	26.5	35.2	102.7	38.25	24	126	35	2.32	4.09	3.1	9.5
229	2	68.9	1.66	25.0036	10.4	22.2	21	17.3	70.9	36.5	20	145	44	2.28	3.82	5.2	10.5
230	2	59.7	1.76	19.273	3.9	7.7	8.3	7.5	27.4	32	20	195	38	2.13	3.59	9.4	12.5
231	2	60.2	1.81	18.3755	4.2	6	8.2	5.1	23.5	40	16	175	42	1.96	3.36	6.8	11
232	1	88.3	1.74	29.165	16.2	27.2	50.4	63.4	157.2	47	23	170	33	2.09	3.68	3.9	9.5
233	1	57.5	1.75	18.7755	4	10.2	5.8	4.6	24.6	30.5	17.5	214	40	2.04	3.41	8.8	12
234	1	58.2	1.72	19.6728	4.6	5.2	6	3.8	19.6	43.5	21	210	42	2.06	3.48	10.4	13
235	2	49	1.54	20.6612	10	11.7	9.8	7.5	39	25.5	33	140	27	2.43	4.28	4.3	10
236	2	58.3	1.73	19.4794	8.2	13.8	9.4	12.4	43.8	23.9	9	142	36	2.45	4.37	2.1	9
237	2	56.7	1.64	21.0812	9.4	15	9.6	9.6	43.6	32.9	33	110	31	2.6	4.55	3.2	9.5
238	2	46.5	1.64	17.2888	4.3	9.8	7.4	6.9	28.4	22.25	17	177	37	2.3	3.83	5.4	10.5
239	1	46.2	1.57	18.7432	6.8	8.8	7.2	10.1	32.9	18.5	12	106	28	2.42	4.6	2.3	9
240	1	65	1.66	23.5883	5.6	7.8	10.1	8.7	32.2	36.5	27	158	39	2.02	3.63	3.1	9.5
241	1	83.1	1.8	25.6481	7.2	23	12	9.6	51.8	47.5	26	185	44	2.13	3.74	5.5	10.5
242	1	72.8	1.66	26.4189	15.2	18.9	13.2	32.2	79.5	39.5	12	165	32	2.09	3.68	4.2	10
243	1	66.7	1.56	27.408	11.4	19.8	25.6	17.2	74	30.5	31	124	32	2.43	4.33	2.5	9
244	1	62.1	1.78	19.5998	4.9	8	8.3	5.2	26.4	49.2	22	173	37	1.86	3.26	5.8	10.5
245	2	53.2	1.76	17.1746	5.3	10.8	9.1	6.5	31.7	32.5	17	116	30	2.27	4.35	4.3	10
246	2	42.8	1.53	18.2836	6.5	15	8.6	7.1	37.2	20.5	17	171	40	2.13	3.69	4.6	10
247	1	60.3	1.68	21.3648	10	14.8	8.3	8.4	41.5	30.5	23	199	41	1.84	3.23	4.8	10
248	2	81.2	1.83	24.2468	3.7	6.8	9.6	5.2	25.3	49.25	28	240	49	1.88	3.27	7.8	11.5
249	2	55.1	1.57	22.3538	11.3	15.6	12.3	13.2	52.4	24.5	25	160	32	2.3	3.98	4.3	10
250	2	55.4	1.77	17.6833	5.6	11.2	11.4	6.1	34.3	27	15	187	42	2.23	3.79	6.3	11
251	1	46.2	1.51	20.2623	10.1	21.8	11.3	6.8	50	25	22	137	32	2.38	4.32	3.8	9.5
252	2	64.8	1.75	21.1592	6	9.5	8.2	8	31.7	31.5	19	160	42	2.14	3.68	7.2	11.5
253	2	67.8	1.79	21.1604	7	13.8	9.6	12.2	42.6	40.5	24	207	51	1.86	3.23	7.2	11.5
254	2	74	1.78	23.3556	9.6	16	9.7	17.4	52.7	35.5	20	188	39	2.08	3.56	7.9	11.5
255	2	65	1.63	24.4646	14.1	19.4	16.4	26.6	76.5	28	18	175	24	2.01	3.68	7.4	11.5
256	1	60.5	1.68	21.4357	8.8	9.2	6.7	8.3	33	36	21	165	35	2.01	3.32	6.7	11
257	1	48	1.59	18.9866	4.7	9.6	11.4	9.8	35.5	22.9	24	145	36	2.23	4.03	3.4	9.5
258	1	53.1	1.71	18.1594	6.9	11.6	9.4	15.2	43.1	23.5	13	100	28	2.39	4.34	2.3	9
259	2	49.6	1.55	20.6452	4.2	6.5	7.6	6.3	24.6	22	32	141	27	2.52	4.49	3.2	9.5
260	2	70.6	1.7	24.4291	14.6	17.5	16.4	23.1	71.6	30.9	29	153	42	2.3	3.88	3.2	9.5
261	2	61	1.64	22.68	16.2	29.6	14.4	11.6	71.8	22.25	24	139	30	2.3	4.28	4.4	10
262	2	52.9	1.69	18.5218	4.2	8.8	8.4	6.6	28	32	4	192	39	1.99	3.51	6.1	11
263	2	71.6	1.71	24.4862	14.6	17.7	16.2	23	71.5	30.65	29	153	42	2.3	3.88	3.2	9.5
264	2	88.5	1.71	30.2657	11.8	20.2	24.6	33.2	89.8	39.9	16	160	39	2.12	3.84	3.7	9.5
265	2	33.7	1.62	12.841	3.4	6.2	6.2	5.2	21	18	11	145	27	2.52	4.44	4.9	10
266	2	65.8	1.61	25.3848	11	22.4	14.1	16.3	63.8	20	30	120	27	2.56	4.45	2.1	9
267	1	60.5	1.71	20.6901	7.2	13.2	10	12.4	42.8	32	23	169	38	3.11	4.67	5.2	10.5
268	1	56.5	1.65	20.753	7.3	13	12	13.1	45.4	27.5	23	148	30	2.35	4.36	4.5	10
269	2	66.4	1.66	24.0964	17.4	26.6	16.2	20	80.2	19.25	31	124	27	2.51	4.58	3.2	9.5
270	2	42	1.62	16.0037	6.8	13.2	8.5	5.8	34.3	20.15	26	142	35	2.44	4.29	4.2	10
271	2	44	1.52	19.0443	7.1	14.1	12.5	7	40.7	22.5	17	109	22	2.57	4.56	2.4	9
272	2	72.2	1.67	25.8883	8.8	16.8	13	21.2	59.8	33	22	154	34	2.32	3.99	4.2	10
273	1	58.7	1.78	18.5267	4.9	7.8	7.3	5.1	25.1	36.5	11.5	140	39	2.12	3.86	6.9	11
274	2	64.2	1.77	20.4922	7	12.2	10.2	9.9	39.3	37	30	160	38	2.2	3.61	6.8	11
275	2	57.9	1.78	18.2742	3.8	6.5	7.7	5.1	23.1	37.25	11	172	41	2.18	3.6	8.5	12
276	2	75.8	1.72	25.622	17.4	25.6	23	19.8	85.8	29.5	27	114	24	2.49	4.52	2.1	9
277	2	75.4	1.67	27.0357	11.5	22	20.4	14	67.9	39.5	25	115	34	2.35	4.19	4.2	10
278	2	66	1.78	20.8307	3.6	5.7	6.8	4.6	20.7	40.5	23	213	48	1.78	3.14	6.9	11
279	2	52.2	1.6	20.3906	11.2	14	16.4	8.4	50	24.75	25	160	30	2.53	4.43	4.9	10
280	1	58.5	1.47	27.0721	7.1	12.8	9.8	7.7	37.4	20.5	21	152	35	2.12	3.72	3.8	9.5
281	2	48.8	1.72	16.4954	4.9	9.7	9.8	9.8	34.2	23.1	31	152	33	2.5	4.34	3.4	9.5
282	2	30.8	1.47	14.2533	3.8	6.9	5.6	4	20.3	21	25	168	36	2.12	3.75	7.2	11.5
283	1	59.2	1.66	21.4835	6.2	14.6	9.4	9.4	39.6	30	31.5	180	38	2.22	3.76	3.4	9.5
284	2	74.4	1.89	20.8281	4.8	8	11.2	6.2	30.2	55.9	12	205	46	1.96	3.35	6.8	11
285	2	46.3	1.62	17.6421	13.8	20.2	18	19	71	24.5	20	146	32	2.2	4.13	3.4	9.5
286	1	64.1	1.68	22.7112	14.6	29.4	14.4	13.2	71.6	27.5	16	122	33	2.29	4.1	3.1	9.5
287	1	70.7	1.65	25.9688	19.8	35	22.3	18.4	95.5	25	22.5	102	22	2.53	4.35	4.1	10
288	1	55.1	1.58	22.0718	12	19.8	18.2	15.9	65.9	20	14	128	28	2.34	4.01	4.4	10
289	2	55.7	1.6	21.7578	12.7	16.2	9.6	14.6	53.1	20.5	30	128	32	2.34	4.19	3.4	9.5
290	2	57.8	1.75	18.8735	8.6	14.5	12.6	13.6	49.3	31.6	7	150	34	2.23	3.98	3.8	9.5
291	2	78.2	1.67	28.0397	15.6	16.2	13.8	17.4	63	45	30.2	199	35	2.25	4.06	3.6	9.5
292	2	64.1	1.6	25.0391	11.9	22	20.2	22.6	76.7	34	17	140	32	2.27	3.89	6.8	11
293	2	55.7	1.6	21.7578	9	13.8	10.2	13	46	26.5	13	186	37	2.1	3.62	6.4	11
294	2	46.3	1.69	16.2109	3.6	6.4	6.7	4.7	21.4	29	16	179	41	1.9	3.04	5.6	10.5
295	2	97.3	1.75	31.7714	18.5	22.2	25.4	28	94.1	33.25	24	157	25	2.31	4.02	4.1	10
296	2	59.4	1.77	18.9601	3.8	7.6	8.6	7.2	27.2	31.5	20	195	38	2.13	3.59	9.4	12.5
297	2	60.3	1.65	22.1488	5.9	11.2	11.4	9.8	38.3	36	8	177	38	1.98	3.87	6.6	11
298	1	43	1.58	17.2248	5.5	11.6	8.8	5.6	31.5	20.5	29.5	127	24	2.38	4.22	3.8	9.5
299	2	57.7	1.56	23.7097	13.8	21.6	12.4	10.6	58.4	31.7	25	140	31	2.17	3.87	5.1	10.5
300	2	48.7	1.66	17.6731	6.5	7.4	11.4	12	37.3	31.5	25	155	35	2.32	4.13	3.2	9.5
301	2	58.1	1.6	22.6953	10.5	22	17.6	9.2	59.3	22	31.7	112	25	2.31	4.19	3.3	9.5
302	2	45	1.69	15.7558	5	6.7	8.3	4.3	24.3	25.5	25	132	28	2.39	4.28	2.2	9
303	2	45	1.61	17.3604	7.2	13	10.7	9	39.9	25	27	143	35	2.04	3.79	5.7	10.5
304	1	46.3	1.52	20.0398	7.8	16	8.4	7.1	39.3	22	30	130	24	2.48	4.44	2.8	9
305	2	63.4	1.77	20.2368	9.2	11.4	9.4	17.8	47.8	30.5	13	180	32	2.17	3.74	6.3	11
306	2	56.7	1.6	22.1484	9.4	13.8	10.2	13.2	46.6	26.5	13	186	37	2.1	3.62	6.4	11
307	1	51.6	1.67	18.5019	6.6	14.4	9.2	5.8	36	21	17	158	29	2.55	4.41	3.1	9.5
308	1	48.5	1.59	19.1844	5.6	13	8	4.6	31.2	24.05	34	135	32	2.25	4.05	5.3	10.5
309	1	58.7	1.7	20.3114	6.2	9.4	7.6	7.8	31	30.25	22	150	37	2.14	3.76	7.8	11.5
310	1	54.9	1.69	19.222	8.1	14	7.4	6.5	36	26.5	24	138	36	2.13	3.73	6.2	11
311	1	51.6	1.69	18.0666	3.7	10.6	9.4	3.8	27.5	30	22	135	43	2.28	3.84	4.3	10
312	1	53.8	1.63	20.2492	4.4	9.8	7.8	5.4	27.4	35.5	21.5	168	36	2.02	3.58	7.5	11.5
313	1	52.5	1.63	19.7599	13.4	16.2	10.8	9.4	49.8	27.5	29.5	98	21	2.7	4.69	3.1	9.5
314	1	50.4	1.63	18.9695	4.2	6.2	6.3	6.1	22.8	37	17	158	40	2.23	3.79	8.3	12
315	1	61.6	1.66	22.3545	9.4	25.6	16	14.4	65.4	28.5	29	123	20	2.39	4.32	3.5	9.5
316	1	58.7	1.75	19.1673	3.2	5.8	6.3	3.8	19.1	49.5	27	182	37	1.91	3.31	7.4	11.5
317	2	71.2	1.75	23.249	9	13.2	9.7	9.8	41.7	39.9	19	160	39	2.21	3.61	7.3	11.5
318	1	55.3	1.58	22.1519	12.6	29.2	12	24	77.8	21.5	33.5	113	28	2.33	4.11	3.8	9.5
319	2	53	1.59	20.9644	9.8	14.8	15	13.6	53.2	25	31	125	36	2.4	4.24	2.7	9
320	2	69.1	1.8	21.3272	5.9	9.2	7.5	8.4	31	38.4	30	210	40	2.26	3.91	8.8	12
321	2	60.3	1.73	20.1477	7.3	11.2	8.9	12.7	40.1	32.25	29	163	42	2.11	3.55	7.2	11.5
322	2	55.2	1.58	22.1118	9.4	19.2	14.8	14.2	57.6	32	15	139	31	2.46	4.3	3.1	9.5
323	1	71.1	1.77	22.6946	5.1	11.4	8.8	5.7	31	45	28	229	49	1.83	3.09	11.1	13.5
324	1	58.5	1.71	20.0062	4.4	6.2	7	4.8	22.4	40	23	197	42	1.84	3.28	8.8	12
325	2	62.4	1.63	23.486	7.4	13	13.3	10.6	44.3	23.5	35	98	24	2.71	4.83	3.2	9.5
326	1	89.5	1.77	28.5678	20.9	32	34.8	36.4	124.1	29.5	12	113	22	2.43	4.62	2.4	9
327	1	58.5	1.76	18.8856	5.1	8.4	10	7.5	31	34	22	157	32	2.02	3.55	5.7	10.5
328	1	105.5	1.78	33.2976	19	40	38.6	51.8	149.4	50	21	136	28	2.26	3.96	2.8	9
329	1	49.8	1.68	17.6446	3.4	4.5	5.8	2.8	16.5	34	23	163	33	2.12	3.83	7.5	11.5
330	1	50.8	1.54	21.4201	7.7	20.8	14.5	12.4	55.4	21	31.5	110	31	2.68	4.84	2.7	9
331	1	52.2	1.58	20.9101	8.2	12.2	10.6	8.8	39.8	28.5	26	109	18	2.46	4.36	3.2	9.5
332	2	66.7	1.78	21.0516	3.7	7.6	8.2	5.1	24.6	44.75	31	190	43	1.97	3.47	9.4	12.5
333	2	67.4	1.69	23.5986	6.8	14.2	11.3	16.4	48.7	37	16.5	174	35	2.08	3.7	5.3	10.5
334	2	87.9	1.6	34.3359	24	37.2	29	44	134.2	26.75	25	110	23	2.65	4.69	1.4	8.5
335	2	76.3	1.76	24.632	7.4	9.7	14.7	13.4	45.2	40.75	23	185	37	2.2	3.64	5.3	10.5
336	2	89.1	1.81	27.197	10.4	17	17	17.8	62.2	46.25	13	184	39	2.13	3.7	5.1	10.5
337	2	48.4	1.62	18.4423	10	17.5	15.2	15.2	57.9	27.5	25	121	27	2.53	4.45	3.4	9.5
338	2	65.8	1.79	20.5362	4.8	8.9	9.2	8.8	31.7	39	18	191	44	1.92	3.25	5.3	10.5
339	2	51.1	1.64	18.9991	4.3	6.6	6.2	4.4	21.5	35	28.5	177	49	1.9	3.4	6.9	11
340	2	107.5	1.86	31.073	14.2	18.6	23.6	42	98.4	48.5	12	179	34	2.31	3.99	5.5	10.5
341	2	51.5	1.52	22.2905	12.2	16.1	11.2	10	49.5	25.25	28	151	35	2.23	4.05	5.2	10.5
342	2	62.1	1.76	20.0478	5.4	8.6	9.3	7.7	31	42	23	210	52	1.95	3.34	7.6	11.5
343	2	46.5	1.64	17.2888	6.8	6.2	6	6.2	25.2	21	13	158	37	2.16	3.78	8.7	12
344	2	62.7	1.68	22.2151	6.2	10.6	13	13.4	43.2	32.25	16	120	36	2.15	3.74	5.5	10.5
345	2	43.4	1.59	17.167	6.6	8.6	6.5	5.4	27.1	22.3	20	140	32	2.23	3.8	7.4	11.5
346	1	49.5	1.66	17.9634	4.6	7.6	7.8	5.4	25.4	29.5	35	160	27	2.3	3.99	3.4	9.5
347	1	48.7	1.64	18.1068	4.8	9	8.3	6.4	28.5	18	23	125	24	2.5	4.62	3.4	9.5
348	2	50.5	1.6	19.7266	4.3	6.6	8	4.4	23.3	35.5	30	203	48	1.9	3.33	9.1	12.5
349	2	46.5	1.59	18.3933	11.1	13.4	11.4	7	42.9	23.25	22.5	127	24	2.34	4.24	4.2	10
350	2	60.6	1.64	22.5312	8.3	9.1	7.3	7.4	32.1	37	22	165	39	2.12	3.56	7.3	11.5
351	2	57.9	1.62	22.0622	13.2	17.6	9.8	13.4	54	35.7	30	160	35	2.2	3.77	5.1	10.5
352	2	58.8	1.75	19.2	3.8	7.6	7.4	4.6	23.4	36	21	176.4	41	2.01	3.39	6.2	11
353	1	49.6	1.61	19.1351	4.8	7.8	8.4	3.6	24.6	34.3	16	168	31	2.11	3.7	6.4	11
354	1	64.2	1.63	24.1635	4.5	7.2	9	7.7	28.4	37.1	26	164	38	2.24	3.74	4.1	10
